# Supplementary material
Source: publisher figshare collection journal article supplement (https://tandf.figshare.com/articles/dataset/_/5327833)
Supplement: Supplementary file 1 [file 1]

1 **Supplementary File 2 - References cited in the list of taxa**

2

3 Abati S, Evangelista M, Minciardi MR, Olivieri L, Selvaggi A, Spada CD. 2012. Nota n. 447. In:  
4 Selvaggi A, Soldano A, Pascale M, editors. Note floristiche piemontesi n. 393-459. Rivista  
5 piemontese di Storia naturale 33: 441-442.

6 Adams RP, Bartel JA, Price RA. 2009. A new genus, *Hesperocyparis*, for the cypresses of the western  
7 hemisphere (Cupressaceae). Phytologia 91: 160-185.

8 Adorni M, Ghillani L, Alessandrini A. 2012. Contributo alla flora del Parmense con alcune aggiunte  
9 alla flora dell'Emilia-Romagna. Informatore Botanico Italiano 44, Suppl. 1: 49-70.

10 Alessandrini A, Salinitro M, Vignodelli M. 2016. Noterella: 0182. In: Alessandrini A, Buono V,  
11 Longo D, Magni C, Manni QG, Nicoletta G, editors. Noterelle: 0175-0202. Acta Plantarum  
12 Notes 4: 151.

13 Alessandrini A, Montanari S, Adorni M, Alberti R, Ardenghi NMG, Bruschi T, Bugni E, Faggi G, Fiandri  
14 F, Fontanesi G, Ghillani L, Gobbato M, Magni C, Marenzi P, Marzorati A, Medri M, Merloni N,  
15 Messina A, Morelli V, Pellizzari M, Picollo S, Romani E, Saiani D, Sirotti M, Sturloni S, Ziletti M.  
16 2017. Rassegna di segnalazioni notevoli riguardanti la Regione Emilia-Romagna comparse nel  
17 forum Acta Plantarum. Acta Plantarum Notes 5: 36-55.

18 Anzalone B, Iberite M, Lattanzi E. 2010. La Flora vascolare del Lazio. Informatore Botanico Italiano  
19 42 187-317.

20 Ardenghi NMG, Mossini S. 2014a. *Cardamine flexuosa* subsp. *debilis* O. E. Schulz. In: Raab-Straube  
21 E von, Raus Th, editors. Euro+Med-Checklist Notulae, 3. Willdenowia 44: 292.

22 Ardenghi NMG, Mossini S. 2014b. Notula: 236. In: Galasso G, Banfi E, editors. Notulae ad plantas  
23 advenas longobardiae spectantes: 4 (209-262). Pagine Botaniche, Milano, 37 (2013): 55.

24 Ardenghi NMG, Mossini S. 2015. *Cucurbita moschata* Duchesne. In: Raab-Straube E von, Raus Th,  
25 editors. Euro+Med-Checklist Notulae, 5. Willdenowia 45: 454.

26 Ardenghi NMG, Parolo G. 2011. Notula: 61. In: Barberis G, Nepi C, Peccenini S, Peruzzi L, editors.  
27 Notulae alla flora esotica d'Italia: 4 (54-89). Informatore Botanico Italiano 43: 145.

28 Bacchetta G, Mayoral García Berlanga O, Podda L. 2009. Catálogo de la flora exótica de la isla de  
29 Ceirdeña. Flora Montiberica 41: 35-61.

30 Banfi E, Galasso G. 2010. La flora esotica lombarda + CD-ROM. Milano: Regione Lombardia,  
31 Museo di Storia Naturale di Milano.

32 Barberis G, Calbi M. 2009. Notula: 17. In: Nepi C, Peccenini S, Peruzzi L, editors. Notulae alla flora  
33 esotica d'Italia: 1 (1-21). Informatore Botanico Italiano 41: 361.

- 34 Beccarisi L, Ernandes P. 2007. Notula: 1350. In: Conti F, Nepi C, Peruzzi, Scoppola A, editors.  
35 Notulae alla checklist della flora vascolare italiana: 4 (1311-1419). *Informatore Botanico*  
36 Italiano 39: 415.
- 37 Bernardo L, Caldararo F. 2014. Nuove acquisizioni per la flora della Basilicata. *Informatore Botanico*  
38 Italiano 46: 53–57.
- 39 Bernardo L, Peruzzi L, Passalacqua NG, editors. 2011. *Flora Vascolare della Calabria. Prodrómo.*  
40 Volume I. *Informatore Botanico Italiano* 43: 185–332.
- 41 Bertolli A, Prosser F. 2014. Segnalazioni Floristiche Tridentine. IX. *Annali del Museo civico di*  
42 *Rovereto. Sezione: Archeologia, Storia, Scienze naturali* 29 (2013): 131–174.
- 43 Bovio M. 2014. *Flora vascolare della Valle d’Aosta. Repertorio commentato e stato delle conoscenze.*  
44 *Sarre (Aosta): Testolin editore.*
- 45 Bracchi G, Romani E. 2009. *Flora esotica d’Italia: nuovi dati per l’Emilia-Romagna. Atti della*  
46 *Società Italiana di Scienze Naturali e del Museo Civico di Storia Naturale di Milano, Milano,*  
47 *150: 29–60.*
- 48 Brundu G, Stinca A, Angius L, Bonanomi G, Celesti-Grapow L, D’Auria G, Griffo R, Migliozi A,  
49 Motti R, Spigno P. 2012. *Pistia stratiotes* L. and *Eichhornia crassipes* (Mart.) Solms.: emerging  
50 invasive alien hydrophytes in Campania and Sardinia (Italy). *Bulletin OEPP/EPPO Bulletin* 42:  
51 568–579.
- 52 Buccomino G, Travaglini A, Paoletta F. 2013. Notula: 165. In: Barberis G, Nepi C, Peccenini S,  
53 Peruzzi L, editors. *Notulae alla flora esotica d’Italia: 8 (161-184).* *Informatore Botanico Italiano*  
54 45: 106–107.
- 55 Camarda I, Cossu TA, Carta L, Brunu A, Brundu G. 2016. An updated inventory of the non-native  
56 flora of Sardinia (Italy). *Plant Biosystems* 150: 1106–1118
- 57 Cecchi L, Arrigoni PV. 2013. Notula: 183. In: Barberis G, Nepi C, Peccenini S, Peruzzi L, editors.  
58 *Notulae alla flora esotica d’Italia: 8 (161-184).* *Informatore Botanico Italiano* 45: 109.
- 59 Celesti-Grapow L, Pretto F, Carli E, Blasi C, editors. 2010. *Flora alloctona e invasiva delle regioni*  
60 *d’Italia. Roma: Casa Editrice Università La Sapienza.*
- 61 Conti F, Bartolucci F, Manzi A, Paolucci M, Santucci B, Petriccione B, Miglio M, Ciaschetti G,  
62 Stinca A. 2016. Integrazioni alla flora vascolare dell’Italia Centrale. *Atti della Società Toscana*  
63 *di Scienze Naturali, Memorie Serie B*, 122 (2015): 33–42.
- 64 Conti F, Branchetti L, Gibellini L. 2011. *Flora vascolare della Riserva Naturale Regionale Sentina*  
65 *(Marche). Delpinoa* 49 (2007): 89–110.
- 66 Corazzi G. 2008. Contributo alla conoscenza della flora del Sannio: il complesso montuoso del  
67 Camposauro (Benevento, Campania). *Webbia* 63: 215–250.

- 68 Cortesi F. 1906. Illustrazione dell'Erbario Borgia. *Annali di Botanica* (Roma) 4: 217–267.
- 69 Costalonga S. 2012. Notula: 116. In: Barberis G, Nepi C, Peccenini S, Peruzzi L, editors. *Notulae*  
70 alla flora esotica d'Italia: 6 (115-136). *Informatore Botanico Italiano* 44: 188.
- 71 Crespo MB. 2011. *Chamaeiris*, an earlier name for *Xyridion* (*Iridoideae*, *Iridaceae*). *Flora*  
72 *Montiberica* 49: 60–71.
- 73 D'Antraccoli M, Roma-Marzio F. 2015. Notula: 290. In: Galasso G, Nepi C, Domina G, Peruzzi L,  
74 editors. *Notulae alla Flora esotica d'Italia: 12 (244-287)*. *Informatore Botanico Italiano* 47: 234.
- 75 D'Antraccoli M, Labate M, Peruzzi L. 2015. Notula: 279. In: Galasso G, Nepi C, Domina G, Peruzzi  
76 L, editors. *Notulae alla Flora esotica d'Italia: 12 (244-287)*. *Informatore Botanico Italiano* 47:  
77 87.
- 78 De Martis B, Loi MC. 1981. *Lippia nodiflora* (L.) Michx. var. *repens* (Bert.) Schauer in DC. e *Lippia*  
79 *canescens* H.B.K. in Sardegna. *Giornale Botanico Italiano* 115: 399.
- 80 De Martis B, Loi MC. 1982. Sul genere *Lippia* (Verbenaceae) in Sardegna. *Atti della Società Toscana*  
81 *di Scienze Naturali, Memorie Serie B*, 39: 1–11.
- 82 Del Guacchio E. 2015. Integrazioni, aggiornamenti e note alla flora esotica della Campania.  
83 *Informatore Botanico Italiano* 47: 147–154.
- 84 Desfayes M. 2008. Flore vasculaire herbacée des eaux douces et des milieux humides de la Sardaigne.  
85 *Flora Mediterranea* 18: 247–331.
- 86 Di Gregorio B, Bellone G, Cassanego E, Longo D, Montalto S, Montoleone E, Tomasello G. 2017.  
87 Rassegna di segnalazioni notevoli riguardanti la Sicilia comparse nel forum *Acta Plantarum*.  
88 *Acta Plantarum Notes* 5: 70–74.
- 89 Domina G, Scafidi F, Ciccarello S. 2015a. Notula: 245. In: Galasso G, Nepi C, Domina G, Peruzzi  
90 L, editors. *Notulae alla Flora esotica d'Italia: 12 (244-287)*. *Informatore Botanico Italiano* 47:  
91 77.
- 92 Domina G, Ciccarello S, Scafidi F. 2015b. Notula: 244. In: Galasso G, Nepi C, Domina G, Peruzzi  
93 L, editors. *Notulae alla Flora esotica d'Italia: 12 (244-287)*. *Informatore Botanico Italiano* 47:  
94 77.
- 95 Faden RB. 2000. Commelinaceae R. Brown. In: *Flora of North America Editorial Committee*, editors.  
96 *Flora of North America*. Vol. 22. New York and Oxford. Available:  
97 [http://www.efloras.org/florataxon.aspx?flora\\_id=1&taxon\\_id=10212](http://www.efloras.org/florataxon.aspx?flora_id=1&taxon_id=10212) Accessed Dec 2016 16.
- 98 Falcinelli F, Conti F, Donnini D. 2016. Secondo contributo alla flora vascolare dell'Umbria (Italia  
99 centrale). *Natural History Sciences. Atti della Società italiana di Scienze naturali e del Museo*  
100 *civico di Storia naturale di Milano* 3: 21–26.

- 101 Fiori A. 1923. Nuova Flora Analitica d'Italia contenente la descrizione delle piante vascolari indigene,  
102 inselvatichite e largamente coltivate in Italia 1. Firenze: Tipografia di M. Ricci.
- 103 Forte L. 2001. Flora e vegetazione del bosco comunale "Difesa Grande" di Gravina in Puglia. Primo  
104 contributo. Atti del convegno Bari-Matera 24-27 Ottobre 1996. Museo Orto Botanico  
105 dell'Università di Bari, Mario Adda Ed.: 183–228.
- 106 Galasso G. 2014. Notula: 217. In: Barberis G, Nepi C, Peccenini S, Peruzzi L, editors. Notulae alla  
107 Flora esotica d'Italia: 10 (202-226). Informatore Botanico Italiano 46: 85–86.
- 108 Galasso G, Domina G, Adorni M, Ardenghi NMG, Banfi E, Bedini G, Bertolli A, Brundu G, Calbi  
109 M, Cecchi L, Cibeï C, D'Antraccoli M, De Bastiani A, Faggi G, Ghillani L, Giardini M, Iberite  
110 M, Kleih M, Latini M, Lazzeri V, Liguori P, Marhold K, Masin R, Mauri S, Meneguzzo E,  
111 Mereu G, Nicoletta G, Olivieri N, Peccenini S, Perrino EV, Peruzzi L, Petraglia A, Pierini B,  
112 Prosser F, Roma-Marzio F, Romani E, Sammartino F, Selvaggi A, Signorile G, Stinca A,  
113 Verloove F, Nepi C. 2016a. Notulae to the Italian alien vascular flora: 1. Italian Botanist 1: 17–  
114 37.
- 115 Galasso G, Domina G, Ardenghi NMG, Arrigoni P, Banfi E, Bartolucci F, Bonari G, Buccomino G,  
116 Ciaschetti G, Conti F, Coppi A, Di Cecco V, Di Martino L, Guiggi A, Lastrucci L, Leporatti  
117 ML, López Tirado J, Maiorca G, Mossini S, Olivieri N, Pennesi R, Romiti B, Scoppola A,  
118 Soldano A, Stinca A, Verloove F, Villa M, Nepi C. 2016b. Notulae to the Italian alien vascular  
119 flora: 2. Italian Botanist 2: 55–71.
- 120 Galasso G, Domina G, Ardenghi NMG, Assini S, Banfi E, Bartolucci F, Bigagli V, Bonari G,  
121 Bonivento E, Cauzzi P, D'Amico FS, D'Antraccoli M, Dinelli D, Ferretti G, Gennai M, Gheza  
122 G, Guiggi A, Guzzon F, Iamónico D, Iberite M, Latini M, Lonati M, Mei G, Nicoletta G,  
123 Olivieri N, Peccenini S, Peraldo G, Perrino EV, Prosser F, Roma-Marzio F, Russo G, Selvaggi  
124 A, Stinca A, Terzi M, Vannini J, Verloove F, Wagensommer RP, Wilhalm T, Nepi C. 2017.  
125 Notulae to the Italian alien vascular flora: 3. Italian Botanist 3: 49–71.
- 126 Gangale C, Uzunov D, Peruzzi L. 2010. Notula: 39. In: Nepi C, Peccenini S, Peruzzi L, editors.  
127 Notulae alla flora esotica d'Italia: 3 (38-53). Informatore Botanico Italiano 42: 533.
- 128 Gasparrini G. 1863. Index seminum in Horto R. Neapolitano an. 1862 collectorum. Neapoli.
- 129 Gestri G, Peruzzi L. 2012. Notula: 138. In: Barberis G, Nepi C, Peccenini S, Peruzzi L, editors.  
130 Notulae alla flora esotica d'Italia: 6 (136-160). Informatore Botanico Italiano 44: 400.
- 131 Giardina G, Raimondo FM, Spadaro V. 2007. A catalogue of plants growing in Sicily. Boccone 20:  
132 5–582.

- 133 Gigante D, Landucci F, Fe' G, Venanzoni R. 2010. Notula: 32. In: Nepi C, Peccenini S, Peruzzi L,  
134 editors. Notulae alla flora esotica d'Italia: 2 (22-37). Informatore Botanico Italiano 42: 387–  
135 388.
- 136 Guadagno M. 1922. La vegetazione della Penisola Sorrentina. Parte Quarta. *Polypodiaceae-*  
137 *Orchidaceae*. Bullettino dell'Orto Botanico della Regia Università di Napoli 7: 67–128.
- 138 Gubellini L, Hofmann N, Pinzi M. 2014. Contributo alla conoscenza della flora vascolare delle  
139 Marche e di alcune regioni limitrofe. Informatore Botanico Italiano 46: 17–26.
- 140 Iamonico D, Lucarini D, Iberite M. 2011. Notula: 78. In: Barberis G, Nepi C, Peccenini S, Peruzzi L,  
141 editors. Notulae alla flora esotica d'Italia: 4 (54-89). Informatore Botanico Italiano 43: 148.
- 142 Lazzaro L, Ferretti G, Galasso G, Lastrucci L, Foggi G. 2013. Contributo alla conoscenza della flora  
143 esotica dell'Arcipelago Toscano, Italia. Atti della Società italiana di Scienze naturali e del  
144 Museo civico di Storia naturale di Milano 154: 3–24.
- 145 Lazzaro L, Ferretti G, Giuliani C, Foggi B. 2014. A checklist of the alien flora of the Tuscan  
146 Archipelago (Italy). Webbia 69: 157–176.
- 147 Lazzeri V, Mascia F, Sammartino F, Campus G, Caredda A, Carlesi V, Fois M, Gestri G, Mannocci  
148 M, Mazzoncini V, Lombraña AC, Santinelli M. 2013. Novità floristiche per le regioni Sardegna  
149 e Toscana. Acta Plantarum Notes 2: 42–59.
- 150 Lazzeri V, Sammartino F, Campus G, Caredda A, Mascia F, Mazzoncini V, Testa N, Gestri G. 2015.  
151 Note floristiche toско-sarde II: novità regionali e locali e considerazioni tassonomiche per le  
152 regioni Sardegna e Toscana. Annali del Museo civico di Rovereto. Sezione: Archeologia,  
153 Storia, Scienze naturali 30: 331–368.
- 154 Lonati M, Meloni F, Vacchiano G, Ferrarato M. 2014. Nota n. 593. In: Selvaggi A, Soldano A,  
155 Pascale M, Dellavedova R, editors. Note floristiche piemontesi n. 545-603. Rivista piemontese  
156 di Storia naturale 35: 401.
- 157 Longo D, Alberti M, Alice A, Cibeì C, Esposito M, Ferrando U, Guadagni F, Marsili S, Mauri ES,  
158 Ottonello M, Salvo R, Severini C. 2017. Rassegna di segnalazioni notevoli riguardanti la  
159 Liguria comparse nel forum Acta Plantarum. Acta Plantarum Notes 5: 16–24.
- 160 Manni QG, Buono V. 2016. Noterella: 0196. In: Alessandrini A, Buono V, Longo D, Magni C, Manni  
161 QG, Nicolella G, editors. Noterelle: 0175-0202. Acta Plantarum Notes 4: 165.
- 162 Manni QG, Lazzeri V. 2013. Noterella: 0120. In: Alessandrini A, Buono V, Lazzeri V, Longo D,  
163 Magni C, Manni QG, Nicolella G, editors. Noterelle: 0088-0137. Acta Plantarum Notes 2: 149.
- 164 Marchetti D. 2011. Note floristiche toско-liguri-emiliane. VIII. Fanerogame nuove o rare per la  
165 regione apuana (liguria-Toscana) e note critiche. Annali del Museo civico di Rovereto. Sezione:  
166 Archeologia, Storia, Scienze naturali 26 (2010): 191–268.

- 167 Marchetti D. 2012. Note floristiche tosco-liguri-emiliane. IX. Fanerogane esotiche osservate o  
168 raccolte nella provincia della Spezia (Liguria). Annali del Museo civico di Rovereto. Sezione:  
169 Archeologia, Storia, Scienze naturali 27 (2011): 253–267.
- 170 Marhold K, Šlenker M, Kudoh H, Zozomová-Lihová J. 2016. *Cardamine occulta*, the correct species  
171 name for invasive Asian plants previously classified as *C. flexuosa*, and its occurrence in  
172 Europe. PhytoKeys 62: 57–72.
- 173 Marrone F, Naselli-Flores L. 2011. Primo reperto di una lenticchia d’acqua alloctona in Sicilia:  
174 *Lemna minuta* Kunth (Araceae Lemnoideae). Naturalista Siciliano 35: 179–235
- 175 Masin R, Scortegagna S. 2012. Flora alloctona del Veneto centro-meridionale (province di Padova,  
176 Rovigo, Venezia e Vicenza - Veneto - NE Italia). Natura Vicentina 15 (2011): 5–54.
- 177 Masin R, Tietto C. 2005. Flora vascolare della Provincia di Padova. Natura Vicentina 9: 7–103.
- 178 Masin R, Bertani G, Favaro G, Pellegrini B, Tietto C, Zampieri AM. 2010. Annotazioni sulla flora  
179 della Provincia di Venezia. Natura Vicentina 13 (2009): 5–106.
- 180 Mele C, Medagli P, Accogli R, Beccarisi L, Albano A, Marchiori S. 2006. Flora of Salento (Apulia,  
181 Southeastern Italy): an annotated checklist. Flora Mediterranea 16: 193–245.
- 182 Munir AA. 1996. A taxonomic review of *Lantana camara* L. and *L. montevidensis* (Spreng.) Briq.  
183 (Verbenaceae) in Australia. Journal of the Adelaide Botanical Gardens 17: 1–27.
- 184 Nesom GL. 2015. Cucurbitaceae Jussieu. In: Flora of North America Editorial Committee, editors.  
185 Flora of North America. Vol. 6. New York and Oxford. Available:  
186 [http://www.efloras.org/florataxon.aspx?flora\\_id=1&taxon\\_id=10233](http://www.efloras.org/florataxon.aspx?flora_id=1&taxon_id=10233) Accessed Dec 2016 22.
- 187 Olivieri N. 2010. Notula: 51. In: Nepi C, Peccenini S, Peruzzi L, editors. Notulae alla flora esotica  
188 d’Italia: 3 (38-53). Informatore Botanico Italiano 42: 534.
- 189 Olivieri N. 2013. Notula: 162. In: Barberis G, Nepi C, Peccenini S, Peruzzi L, editors. Notulae alla  
190 flora esotica d’Italia: 8 (161-184). Informatore Botanico Italiano 45: 106.
- 191 Olivieri N. 2014. 2014. Notula: 229. In: Barberis G, Nepi C, Peccenini S, Peruzzi L, editors. Notulae  
192 alla Flora esotica d’Italia: 11 (227-243). Informatore Botanico Italiano 46: 278.
- 193 Olivieri N. 2015. Notula: 273. In: Galasso G, Nepi C, Domina G, Peruzzi L, editors. Notulae alla  
194 Flora esotica d’Italia: 12 (244-287). Informatore Botanico Italiano 47: 85–86.
- 195 Palermo D, Buono V. 2016. Noterella: 0189. In: Alessandrini A, Buono V, Longo D, Magni C, Manni  
196 QG, Nicoletta G, editors. Noterelle: 0175-0202. Acta Plantarum Notes 4: 189.
- 197 Parson WT, Cuthbertson EG. 2001. Noxious weeds of Australia. 2<sup>nd</sup> ed. Melbourne: Csiro Publishing.
- 198 Pasquale F. 1894. La *Marsilia quadrifoliata* nelle provincie meridionali d’Italia e la *Elodea*  
199 *canadensis*, Rich., in Italia. Bollettino della Società Botanica Italiana Anno 1894: 265–266.

200 Pasquale F. 1896. L'*Elodea canadensis* Rich. nelle provincie meridionali d'Italia. Bullettino della  
 201 Società Botanica Italiana Anno 1896: 5–6.

202 Pasquali G. 2013. Noterella: 0101. In: Alessandrini A, Buono V, Lazzeri V, Longo D, Magni C,  
 203 Manni QG, Nicolella G, editors. Noterelle: 0088-0137. Acta Plantarum Notes 2: 130.

204 Pasta S. 2012. A new casual alien plant in Sicily: *Persicaria capitata* (Buch.-Ham. ex D.Don)  
 205 H.Gross (*Polygonaceae*). Naturalista Siciliano 36: 111–116.

206 Peruzzi L, Savio L. 2011. Notula: 83. In: Barberis G, Nepi C, Peccenini S, Peruzzi L, editors. Notulae  
 207 alla flora esotica d'Italia: 4 (54-89). Informatore Botanico Italiano 43: 149.

208 Peterson PM. 2003. Eragrostis Wolf. In: Flora of North America Editorial Committee, editors. Flora  
 209 of North America. Vol. 25. New York and Oxford, Oxford University Press, New York.  
 210 Available: <http://herbarium.usu.edu/webmanual/> Accessed Dec 2016 27.

211 Podda L, Fraga i Arguimbau P, Mayoral García-Berlanga O, Mascia F, Bacchetta G. 2010.  
 212 Comparación de la flora exótica vascular en sistemas de islas continentales: Cerdeña (Italia) y  
 213 Baleares (España). Anales del Jardín Botánico de Madrid 67: 157-176.

214 Podda L, Lazzeri V, Mascia F, Mayoral O, Bacchetta G. 2012. The Checklist of the Sardinian Alien  
 215 Flora: an Update. Notulae Botanicae Horti Agrobotanici 40: 14–21.

216 Propetto G, Bruna A, Radivo S. 2017. Rassegna di segnalazioni notevoli riguardanti il Friuli-Venezia  
 217 Giulia comparse nel forum Acta Plantarum. Acta Plantarum Notes 5: 31–35.

218 Pyšek P, Richardson DM, Rejmánek M, Webster GL, Williamson M, Kirschner J. 2004. Alien plants  
 219 in checklist and floras: towards better communication between taxonomists and ecologists.  
 220 Taxon 53: 131–143.

221 Raimondo FM, Spadaro V. 2009. Addenda et emendanda to the “A catalogue of the plants growing  
 222 in Sicily. Flora Mediterranea 19: 303–312.

223 Rosati L, Salerno G, Del Vico E, Lapenna MR, Villani MC, Filesì L, Fascetti S, Lattanzi E. 2012. Un  
 224 aggiornamento alla flora del Cilento e della Campania. Informatore Botanico Italiano 44: 111–  
 225 119.

226 Salerno G, Ceschin S. 2015. Notula: 264. In: Galasso G, Nepi C, Domina G, Peruzzi L, editors.  
 227 Notulae alla Flora esotica d'Italia: 12 (244-287). Informatore Botanico Italiano 47: 83–84.

228 Sanders RW. 2012. Taxonomy of *Lantana* sect. *Lantana* (Verbenaceae): II. Taxonomic revision.  
 229 Journal of the Botanical Research Institute of Texas 6: 403–441.

230 Santisi S, De Masi F, Esposito G, Federico C. 1981. Osservazioni sulle comunità fitoplanctoniche del  
 231 lago “La Correa” in Campania. Annali della Facoltà di Scienze Agrarie della Università di  
 232 Napoli, Portici, Ser. 4, 15: 47–56.

- 233 Schiappacasse A, Peccenini S. 2009. Notula: 19. In: Nepi C, Peccenini S, Peruzzi L, editors. Notulae  
234 alla flora esotica d'Italia: 1 (1-21). Informatore Botanico Italiano 41: 361.
- 235 Schicchi R. 1999. Spontaneizzazione di *Ficus microcarpa* L. (Moraceae) e *Cardiospermum*  
236 *grandiflorum* Sw. (Sapindaceae) in Sicilia. Naturalista Siciliano 23: 315–317.
- 237 Stinca A, Motti R. 2009. The vascular flora of the Royal Park of Portici (Naples, Italy). Webbia 64:  
238 235–266.
- 239 Stinca A, D'Auria G, Motti R. 2012. Integrazioni alla flora vascolare aliena della Campania (Sud  
240 Italia). Informatore Botanico Italiano 44: 287–293.
- 241 Stinca A, D'Auria G, Salerno G, Motti R. 2013. Ulteriori integrazioni alla flora vascolare aliena della  
242 Campania (Sud Italia). Informatore Botanico Italiano 45: 71–81.
- 243 Stinca A, Croce A, D'Auria G, Salerno G, Santangelo A, Rosati L, Motti R. 2016. Nuovi dati sulla  
244 flora vascolare aliena della Campania (Sud Italia). Atti della Società Toscana di Scienze  
245 Naturali, Memorie Serie B, 122 (2015): 89–110.
- 246 Tenore M. 1824-1829. Flora Napolitana. Vol. 3. Napoli: Nella Stamperia Francese.
- 247 Verloove F, Ardenghi NMG. 2015. New distributional records of non-native vascular plants in  
248 northern Italy. Natural History Sciences. Atti della Società italiana di Scienze naturali e del  
249 Museo civico di Storia naturale di Milano 2: 5–14.
- 250 Verloove F, Banfi E, Galasso G. 2014. Notula: 214. In: Barberis G, Nepi C, Peccenini S, Peruzzi L,  
251 editors. Notulae alla flora esotica d'Italia: 10 (202-226). Informatore Botanico Italiano 46: 85.
- 252 Verloove F, Selvaggi A. 2011. Nota n. 593. In: Selvaggi A, Soldano A, Pascale M, editors. Note  
253 floristiche piemontesi n. 309-392. Rivista piemontese di Storia naturale 32: 400.
- 254 Viegi L, Cela Renzoni G. 1981. Flora esotica d'Italia: le specie presenti in Toscana. Roma: C.N.R.,  
255 AQ/1/132.
- 256 Ward DB. 2006. A name for a hybrid *Kalanchoe* now naturalized in Florida. Cactus and Succulent  
257 Journal 78: 92–95.
- 258 Wilhalm T, Aichner G, Hilpold A, Hölzl N, Joos H, Leitner D, Pellegrini B, Pizzulli A, Rinner A,  
259 Stockner W, Tratter W. 2013. Ergänzungen und Korrekturen zum Katalog der Gefäßpflanzen  
260 Südtirols (5). Gredleriana 13: 31–44.
- 261
