# Supplementary material
Source: publisher figshare collection journal article supplement (https://tandf.figshare.com/articles/dataset/_/5327833)
Supplement: Supplementary file 2 [file 1]

1 **Supplementary File 1 - List of taxa**

2 For references cited in the text see Supplementary File 2.

3

4 ***Acalypha virginica* L.** [≡ *Ricinocarpus virginicus* (L.) Kuntze]

5 Euphorbiaceae - T scap - North America (USA) - Neophyte.

6 *First reports for Campania (casual) and Calabria (casual).*

7 *Exsiccata*: CAMPANIA - Avellino in centro, uncultivated land, 358 m, 15.X.2013, 33T 481995-  
8 4529103, *leg. et det.* A. Santangelo (NAP); Napoli all'Orto Botanico, between floor cracks, 30 m,  
9 25.X.2012, 33T 438013-4523652, *leg. et det.* A. Stinca (PORUN); Portici al Parco Reale (Napoli),  
10 between floor cracks, 56 m, 24.X.2013, 33T 444626-4518072, *leg. et det.* A. Stinca (PORUN).  
11 CALABRIA - Scalea a Scalea Vecchia (Cosenza), between floor cracks, 45 m, 14.VIII.2015, 33S  
12 567707-4407711, *leg.* A. Stinca *et* M. Ravo, *det.* A. Stinca (PORUN).

13 *Observata*: CAMPANIA - Napoli lungo via Foria, between floor cracks, 23 m, 25.X.2012, 33T  
14 438052-4523683, *obs. et det.* A. Stinca.

15 Distribution in Italy: Piemonte, Lombardia, Trentino-Alto Adige, Veneto, Friuli Venezia Giulia,  
16 Liguria, Emilia-Romagna, Toscana and Puglia (Celesti-Grappow et al. 2010).

17 Notes: in Campania *A. virginica* L. has been recently observed also by C. Pontoni (Forum Acta  
18 Plantarum, <http://www.actaplantarum.org/floraitaliae/viewtopic.php?f=40&t=50278>), but not  
19 officially published.

20

21 ***Alcea biennis* Winterl subsp. *biennis*** [≡ *Althaea biennis* (Winterl) Borbás; = *Althaea pallida*  
22 Willd.; = *Alcea pallida* (Willd.) Waldst. & Kit.] Malvaceae - H scap - South-East Europe -  
23 Neophyte.

24 *First reports for Campania and southern Italy (casual).*

25 *Exsiccata*: CAMPANIA - Magliano Vetere a Magliano Nuovo (Salerno), road edge, 718 m,  
26 08.X.2016, 33T 521829-4465314, *leg.* A. Stinca *et* M. Ravo, *det.* E. Del Guacchio *et* A. Stinca  
27 (PORUN).

28 *Observata*: CAMPANIA - Magliano Vetere a Magliano Nuovo (Salerno), road edge, 718 m,  
29 12.IX.2014, 33T 521829-4465314, *obs. et det.* A. Stinca.

30 Distribution in Italy: Lombardia, Friuli Venezia Giulia, Veneto, Emilia-Romagna, Lazio, Abruzzo  
31 and Sardegna (Bracchi & Romani 2009; Celesti-Grappow et al. 2010; Masin & Scortegagna 2012;  
32 Lazzeri et al. 2013; for Sardegna not reported by Camarda et al. 2016).

33 Notes: the individuals observed in Campania have spread by seeds of cultivated plants.

34

35 ***Asparagus asparagoides* (L.) Druce** [= *Medeola asparagoides* L.; ≡ *Elide asparagoides* (L.)  
36 Kerguelen; = *Asparagus medeoloides* (L.f.) Thunb.]

37 Asparagaceae - P lian - South Africa - Neophyte.

38 *First reports for Campania and continental Italy (casual).*

39 *Exsiccata*: CAMPANIA - Torre del Greco presso i Camaldoli della Torre (Napoli), wood edge with  
40 *Pinus pinea* L., 95 m, 23.II.2013, 33T 448830-4514467, *leg.* A. Stinca *et* G. D'Auria, *det.* A. Stinca  
41 (PORUN).

42 *Observata*: CAMPANIA - Torre del Greco presso i Camaldoli della Torre (Napoli), wood edge  
43 with *Pinus pinea* L., 95 m, 11.II.2011, 33T 448830-4514467, *obs. et det.* A. Stinca; Torre del Greco  
44 presso i Camaldoli della Torre (Napoli), wood edge with *Pinus pinea* L., 95 m, 18.VI.2017, 33T  
45 448830-4514467, *obs. et det.* A. Stinca.

46 Distribution in Italy: Sicilia and Sardegna (Giardina et al. 2007; Podda et al. 2010; in Sardegna not  
47 reported by Camarda et al. 2016).

48 Notes: rarely cultivated as ornamental plant in the parks of the Campania region. In Torre del  
49 Greco, where this species we observed for the first time in 2011, we detected many individuals in  
50 bloom.

51

52 ***Bidens subalternans* DC.**

53 Asteraceae - T scap - South America - Neophyte.

54 *First reports for Basilicata (naturalized).*

55 *Exsiccata*: BASILICATA - Irsina in località Taccone (Matera), road edge, 250 m, 15.XI.2014, 33T  
56 598000-4516600, *leg. et det.* S. Fascetti *et* L. Rosati (HLUC).

57 Distribution in Italy: Lombardia, Friuli Venezia Giulia, Liguria, Marche, Umbria, Lazio, Abruzzo,  
58 Molise, Campania and Puglia (Celesti-Grappow et al. 2010; Marchetti 2012; Conti et al. 2016;  
59 Falcinelli et al. 2016; Galasso et al. 2016a; Palermo & Buono 2016).

60 Notes: this species was mainly found in marginal rural areas and along roads. Its rapid spread and  
61 naturalization status are due to a relevant production of hooked achenes specialized for zoochorous  
62 dispersion by mammals or birds, in addition by human.

63

64 ***Cardamine occulta* Hornem.** [= *Cardamine flexuosa* With. subsp. *debilis* O.E.Schulz; =  
65 *Cardamine hamiltonii* G.Don]

66 Brassicaceae - T scap - South-East Asia - Neophyte.

67 *First reports for Campania and southern Italy (casual).*

68 *Exsiccata*: CAMPANIA - Pignataro Maggiore ai Vivai Imperatore (Caserta), field used to the  
69 stationing of potted plants and humid ditch, 67 m, 27.III.2015, 33T 429047-4559902, *leg. et det.* A.  
70 Stinca (PORUN); Castellammare di Stabia tra località Muscariello e località Petrarò (Napoli),  
71 cultivated field with *Fatsia japonica* (Thunb.) Decne. & Planch., 21 m, 19.IV.2016, 33T 457696-  
72 4506833, *leg. et det.* A. Stinca (PORUN); Gragnano presso la Casa Circondariale (Napoli),  
73 flowerbed, 80 m, 31.III.2015, 33T 458941-4505744, *leg. et det.* A. Stinca (PORUN); Napoli al  
74 Centro Direzionale, between floor cracks, 9 m, 13.I.2016, 33T 439130-4522986, *leg. et det.* A.  
75 Stinca (PORUN); Baronissi in centro (Salerno), flowerbed, 183 m, 09.II.2016, 33T 480984-  
76 4510253, *leg.* A. Stinca *et* M. Ravo, *det.* A. Stinca (PORUN); Caserta presso la Stazione delle  
77 Ferrovie dello Stato, flowerbed and between floor cracks, 62 m, 16.XI.2016, 33T 443778-4546517,  
78 *leg. et det.* A. Stinca (PORUN); San Nicola la Strada lungo l'Autostrada A1 all'area di servizio S.  
79 Nicola Est (Caserta), flowerbed, 45 m, 24.XI.2016, 33T 442954-4544505, *leg. et det.* A. Stinca  
80 (PORUN); Altavilla Silentina in località Quercioni (Salerno), pot with ornamental plants, 117 m,  
81 04.XII.2016, 33T 509605-4485032, *leg. et det.* E. Del Guacchio (Herb. Del Guacchio); Capaccio  
82 Paestum presso il Museo di Paestum, pot with ornamental plants, 19 m, 01.I.2017, 33T 500549-  
83 4474794, *leg. et det.* E. Del Guacchio (Herb. Del Guacchio); Caserta presso la Stazione delle  
84 Ferrovie dello Stato, pot with ornamental plants, 62 m, 01.II.2017, 33T 443754-4546387, *leg. et*  
85 *det.* A. Stinca (PORUN).

86 *Observata*: CAMPANIA - Napoli a Ponticelli, pot with ornamental plants, 37 m, 15.III.2017, 33T  
87 444293-4523135, *obs. et det.* E. Del Guacchio.

88 Distribution in Italy: only recently it has been discovered in Italy in Piemonte, Lombardia, Trentino-  
89 Alto Adige, Veneto, Toscana and Sardegna (Lazzeri et al. 2013; Ardenghi & Mossini 2014a;  
90 Verloove & Ardenghi 2015; Marhold et al. 2016; Galasso et al. 2016a; for Sardegna not reported by  
91 Camarda et al. 2016).

92 Notes: the nomenclature of this taxon only recently has been elucidated. Indeed, in Europe *C.*  
93 *occulta* Hornem. has also been reported under the names *C. flexuosa* With. subsp. *debilis*  
94 O.E.Schulz or *C. hamiltonii* G.Don (Marhold et al. 2016). Our data confirm that it has been largely  
95 widespread by nurseries and soil transportation.

96

97 ***Casuarina equisetifolia* L.**

98 Casuarinaceae - P scap - Australia - Neophyte.

99 *First reports for Campania (casual).*

100 *Exsiccata*: CAMPANIA - Capua presso il Ponte Romano (Caserta), between floor cracks and walls,  
101 26 m, 03.IV.2014, 33T 433616-4551142, *leg. et det.* A. Stinca *et* G. Salerno (PORUN).

102 Distribution in Italy: Toscana, Puglia, Sicilia and Sardegna (Celesti-Grapow et al. 2010; Lazzaro et  
103 al. 2014).

104 Notes: rarely cultivated as ornamental plant in the parks of the Campania region. In Capua we  
105 observed many young individuals and seedlings born from seed close to mother plants.

106

107 ***Cedrus atlantica* (Endl.) G.Manetti ex Carrière** [≡ *Pinus atlantica* Endl.]

108 Pinaceae - P scap - North Africa - Neophyte.

109 *First reports for Basilicata and southern Italy (casual).*

110 *Exsiccata*: BASILICATA - Pignola in località Serra di Riofreddo (Potenza), spontaneous in  
111 reforestation area, 1160 m, 12.VI.2010, 33T 569632-4491680, *leg. et det.* S. Fascetti et L. Rosati  
112 (HLUC).

113 Distribution in Italy: Lombardia, Abruzzo, Lazio, Sicilia and Sardegna (Raimondo & Spadaro 2009;  
114 Celesti-Grapow et al. 2010; Buccomino et al. 2013; Ardenghi & Mossini 2014b; Galasso et al.  
115 2016b).

116

117 ***Cedrus deodara* (Roxb.) G.Don** [≡ *Pinus deodara* Roxb.]

118 Pinaceae - P scap - Asia - Neophyte.

119 *First reports for Basilicata (casual).*

120 *Exsiccata*: BASILICATA - Potenza nei pressi della stazione ferroviaria di Potenza Superiore,  
121 uncultivated land, 748 m, 15.IV.2008, 33T 567667-4499835, *leg. et det.* S. Fascetti et L. Rosati  
122 (HLUC).

123 Distribution in Italy: Lombardia, Trentino-Alto Adige, Veneto, Emilia Romagna, Abruzzo and  
124 Campania (Stinca & Motti 2009; Celesti-Grapow et al. 2010; Olivieri 2014; Alessandrini et al.  
125 2017).

126

127 ***Chamaeiris orientalis* (Mill.) M.B.Crespo** [≡ *Iris orientalis* Mill.; = *Iris ochroleuca* L.; ≡ *Xyridion*  
128 *orientalis* (Mill.) Rodion]

129 Iridaceae - G rhiz - South-East Europe (Greece and Turkey) - Neophyte.

130 *First reports for Campania and southern Italy (casual).*

131 *Observata*: CAMPANIA - Tra Angri e S. Egidio del Monte Albino (Salerno), motorway edge, 56  
132 m, 15.III.2011, 33T 465756-4509678, *obs. et det.* A. Stinca; Tra Angri e S. Egidio del Monte  
133 Albino (Salerno), motorway edge, 56 m, 09.III.2015, 33T 465756-4509678, *obs. et det.* A. Stinca.

134 Distribution in Italy: only recently it has been reported in Italy for Lombardia, Marche and Toscana  
135 (Banfi & Galasso 2010; Conti et al. 2011; Gestri & Peruzzi 2012).

136 Notes: we followed the nomenclature of Crespo (2011).

137

138 ***Cotula coronopifolia* L.**

139 Asteraceae - T scap - South Africa - Neophyte.

140 *First reports for Campania and southern Italy (naturalized).*

141 *Exsiccata*: CAMPANIA - Castel Volturno a I Variconi (Caserta), saltmarshes, 0 m, 16.VII.2013,

142 33T 410452-4542069, *leg. et det.* A. Santangelo *et* S. Strumia (NAP).

143 Distribution in Italy: Liguria, Lazio and Sardegna (Celesti-Grappow *et al.* 2010).

144 Notes: this species is widespread in the periodically inundated halophilous marshes, where it  
145 appears stabilized.

146

147 ***Cucurbita moschata* Duchesne**

148 Cucurbitaceae - T scap - South America - Neophyte.

149 *First reports for Campania and Italian peninsula (casual).*

150 *Exsiccata*: CAMPANIA - Agerola a Pianillo (Napoli), creek, 640 m, 23.VIII.2013, 33T 461109-

151 4498260, *leg. et det.* A. Stinca (PORUN); Positano a Nocella (Salerno), path edge, 330 m,

152 02.XI.2013, 33T 457842-4497582, *leg.* A. Stinca, *det.* A. Stinca, E. Del Guacchio *et* E. Banfi

153 (PORUN); Gragnano alla Valle dei Mulini (Napoli), creek, 228 m, 30.VII.2016, 33T 460593-

154 4503502, *leg.* A. Stinca *et* M. ravo, *det.* A. Stinca (PORUN);.

155 Distribution in Italy: only recently it has been reported in Italy for Piemonte (Ardenghi & Mossini  
156 2015).

157 Notes: the identification of species among plants of domesticated *Cucurbita* L. is often difficult  
158 (especially among *C. maxima* Duchesne, *C. melopepo* L., *C. moschata* Duchesne and *C. pepo* L.)  
159 because habit, indumentum, leaf shape, and floral characters commonly show parallel variation, and  
160 fruit shape and size are highly variable (Nesom 2015). Our samples, bearing immature fruits, were  
161 identified especially by the features of the hairs. *C. moschata* Duchesne is widely cultivated in  
162 Campania within local cultivars.

163

164 ***Elodea canadensis* Michx.**

165 Hydrocharitaceae - I rad - North America (USA and Mexico) - Neophyte.

166 *First reports for Basilicata (casual).*

167 *Exsiccata*: BASILICATA - Pignola al Lago del Pantano (Potenza), 767 m, still waters, 15.VII.1989,

168 33T 563185-4493334, *leg. et det.* S. Fascetti (HLUC).

169 Distribution in Italy: Valle d'Aosta, Piemonte, Lombardia, Trentino-Alto Adige, Veneto, Friuli  
170 Venezia Giulia, Liguria, Emilia Romagna, Toscana, Umbria, Lazio, Abruzzo, Molise and not  
171 recently confirmed in Campania (Celesti-Gradow et al. 2010).

172 Notes: in Campania, *E. canadensis* Michx. was anciently reported between Vico di Pantano and  
173 Ponte a Mare (Caserta) (Pasquale 1894), Pascone (Naples) (Pasquale 1896), Sarno River (Naples  
174 and Salerno) (Guadagno 1922; Fiori 1923, sub *Helodea canadensis* [Rich. in Michx.] Casp.) and  
175 Royal Park of Caserta (Guadagno 1922). According to Croce et al. (2011) the recent report for  
176 Corree Lake (Caserta) by Santisi et al. (1981) is erroneous and must be attributed to *Egeria densa*  
177 Planch. (see also Del Guacchio 2015).

178

179 ***Eragrostis mexicana* (Hornem.) Link subsp. *virescens* (J.Presl) S.D.Koch & Sánchez Vega** [=   
180 *E. virescens* J.Presl]

181 Poaceae - T scap - SouthAmerica (Argentina and Chile) - Neophyte.

182 *First reports for Campania.*

183 *Exsiccata*: CAMPANIA - Baronissi presso località Cariti (Salerno), flowerbed, 197 m, 10.X.2015,  
184 33T 480638-4511385, *leg.* A. Stinca, *det.* E. Banfi *et* G. Galasso, *rev.* P.M. Peterson (PORUN);  
185 Baronissi presso località Cariti (Salerno), flowerbed, 197 m, 14.IX.2016, 33T 480638-4511385, *leg.*  
186 A. Stinca, *det.* E. Banfi *et* G. Galasso, *rev.* P.M. Peterson (PORUN, MSNM, Herb. Del Guacchio).

187 Distribution in Italy: Valle d'Aosta, PiemonteLombardia, Trentino-Alto Adige, Veneto, Friuli  
188 Venezia Giulia, Liguria, Emilia-Romagna, Puglia and Calabria (Celesti-Gradow et al. 2010;  
189 Verloove & Selvaggi 2011; Bovio 2014; Verloove et al. 2014; Galasso et al. 2016a, 2017).

190 Notes: the collected specimens are rather atypical, because they bear very short spikelets (up to 3.1  
191 mm long) with only 2-5 florets (cf. Peterson 2003) The plant has been accidentally introduced as a  
192 soil contaminant.

193

194 ***Euphorbia nutans* Lag.** [= *Chamaesyce nutans* (Lag.) Small; = *Euphorbia preslii* Guss.]

195 Euphorbiaceae - T scap - North America (Canada and USA) - Neophyte.

196 *First reports for Calabria (casual) and change of the invasive status for Campania (previous*  
197 *status: casual alien; current status: naturalized alien).*

198 *Exsiccata*: CALABRIA - Scalea in Contrada S. Angelo al Vivaio Agrigarden (Cosenza), moved  
199 soil, 20 m, 08.IX.2015, 33S 570745-4403790, *leg. et det.* S. Fascetti (HLUC). CAMPANIA -  
200 Montecorice (Salerno), humid clayey uncultivated land, ca. 180 m, 01.IX.1999, 33T 4984-44533,  
201 *leg. et det.* E. Del Guacchio (Herb. Del Guacchio); Salerno lungo il Fiume Fuorni presso località  
202 M.o del Pigno, riparian vegetation, 65 m, 03.XI.2003, 33T 487838-4501996, *leg. et det.* E. Del

203 Guacchio (Herb. Del Guacchio); Salerno in località S. Andrea, moved soil, 112 m, 16.IX.2005, 33T  
204 486848-4500667, *leg. et det.* E. Del Guacchio (Herb. Del Guacchio).

205 *Observata*: CAMPANIA - Altavilla Silentina in località Quercioni (Salerno), vegetable garden, 117  
206 m, 19.IX.2016, 33T 509605-4485032, *obs. et det.* E. Del Guacchio.

207 Distribution in Italy: Piemonte, Lombardia, Trentino-Alto Adige, Veneto, Friuli Venezia Giulia,  
208 Liguria, Emilia-Romagna, Toscana, Marche, Umbria, Lazio, Abruzzo, Campania, Puglia and Sicilia  
209 (Mele et al. 2006; Barberis & Calbi 2009; Celesti-Gradow et al. 2010).

210 Notes: *E. nutans* Lag. has been reported as a casual alien for several localities in Campania (Stinca  
211 et al. 2016), where it was known as spontaneous since the XIX century (Gasparrini 1863, sub *E.*  
212 *preslii*). However, according to Celesti-Gradow et al. (2010), this species in Cilento appears  
213 stabilized.

214

215 ***Fagopyrum esculentum* Moench**

216 Polygonaceae - T scap - South Asia (China) - Archaeophyte.

217 *First reports for Puglia (casual).*

218 *Exsiccata*: PUGLIA - Carovigno a Serranova (Brindisi), ancient olive grove, 23 m, 24.VII.2012,  
219 33T 733394-4509588, *leg. et det.* E.V. Perrino (BI).

220 Distribution in Italy: Lombardia, Trentino-Alto Adige, Veneto, Friuli Venezia Giulia, Emilia  
221 Romagna, Umbria and Campania (Celesti-Gradow et al. 2010; Del Guacchio 2015; Alessandrini et  
222 al. 2017).

223

224 ***Ficus microcarpa* L.f.** [– *Ficus retusa* auct., non L.]

225 Moraceae - P scap - Asia and North Australia - Neophyte

226 *First report for Campania (casual).*

227 *Exsiccata*: CAMPANIA - Salerno al Lungomare Trieste, wall near the sea, 1 m, 33T 479843-  
228 4502884, *leg. et det.* E. Del Guacchio (NAP).

229 Distribution in Italy: Puglia and Sicilia (Schicchi 1999; Galasso et al. 2017). Also reported in  
230 Sardegna (Lazzeri et al. 2015), but indicated as “only planted” by Camarda et al. (2016).

231 Notes: often cultivated as pot plant (cultivar ‘Ginseng’) and sometimes planted in the parks of the  
232 investigated area. The only observed juvenile individual likely have been dispersed by ornithochory  
233 from not very close mother-plants.

234

235 ***Hesperocyparis arizonica* (Greene) Bartel** [≡ *Cupressus arizonica* Greene; ≡ *Callitropsis*  
236 *arizonica* (Greene) D.P.Little]

237 Cupressaceae - P scap - North America (USA and Mexico) - Neophyte.  
 238 *First reports for Basilicata (casual).*  
 239 *Exsiccata*: BASILICATA - Atella in località Refezzella (Potenza), spontaneous in reforestation  
 240 area, 437 m, 15.II.2015, 33T 545674-4529523, *leg. et det.* S. Fascetti *et* L. Rosati (HLUC); Atella  
 241 in località Toppo dell'Elce (Potenza), spontaneous in reforestation area, 521 m, 15.II.2015, 33T  
 242 546617-4529169, *leg. et det.* S. Fascetti *et* L. Rosati (HLUC);  
 243 Vietri di Potenza presso lo svincolo tra la SP 14 e la SS E847 (Potenza), spontaneous in  
 244 reforestation area, 767 m, 19.XII.2016, 33T 548236-4496528, *leg. et det.* S. Fascetti *et* L. Rosati  
 245 (HLUC).  
 246 Distribution in Italy: Friuli Venezia Giulia, Marche, Umbria, Puglia, Calabria and Sardegna (Forte  
 247 2001; Bacchetta *et al.* 2009; Celesti-Gradow *et al.* 2010; Propetto *et al.* 2017). The report for  
 248 Campania (Corazzi 2008) is doubtful (Del Guacchio 2015).  
 249  
 250 ***Hesperocyparis glabra* (Sudw.) Bartel** [ $\equiv$  *Cupressus glabra* Sudw.;  $\equiv$  *Callitropsis glabra* (Sudw.)  
 251 D.P.Little]  
 252 Cupressaceae - P scap - North America (USA and Mexico) - Neophyte.  
 253 *First reports for Campania (casual) and Basilicata (casual).*  
 254 *Exsiccata*: CAMPANIA - Monteverde presso il Fiume Ofanto al confine con Aquilonia (Avellino),  
 255 spontaneous in reforestation area, 272 m, 29.XII.2016, 33T 547583-4535466, *leg. et det.* A. Stinca  
 256 (PORUN); Monteverde lungo la SP 155 tra località Masseria Vella e località Caudaro (Avellino),  
 257 spontaneous in reforestation area, 434 m, 29.XII.2016, 33T 546327-4536309, *leg. et det.* A. Stinca  
 258 (PORUN). BASILICATA - Vietri di Potenza presso lo svincolo tra la SP 14 e la SS E847  
 259 (Potenza), spontaneous in reforestation area, 767 m, 19.XII.2016, 33T 548236-4496528, *leg. et det.*  
 260 S. Fascetti *et* L. Rosati (HLUC).  
 261 Distribution in Italy: Friuli Venezia Giulia, Toscana, Abruzzo and Puglia (Lazzaro *et al.* 2013;  
 262 Olivieri 2013; Manni & Buono 2016; Propetto *et al.* 2017).  
 263 Notes: *H. arizonica* (Greene) Bartel and *H. glabra* (Sudw.) Bartel are widespread in southern Italy  
 264 as a result of reforestation programs and also used as windbreaks hedges and ornamental. In the  
 265 mentioned localities we observed many young individuals up to 1.5 m and seedlings born from seed  
 266 close to mother plants. Currently these species must be considered a casual alien plants, because  
 267 they may reproduce occasionally in the study area, but it is not possible, at the present state of  
 268 knowledge, to ensure that they form self-replacing populations due to the length of the reproductive  
 269 cycle. However, we observed some young plants producing seeds and this could indicate the  
 270 possibility that these plants will constitute self-sustaining populations. Further field investigations



are necessary for the proper attribution of the invasive status according to the terminology proposed by Pyšek et al. (2004). For the taxonomic scheme and nomenclature of both species, we followed Adams et al. (2009).

274

***Kalanchoë ×houghtonii* D.B.Ward** [≡ *Bryophyllum ×houghtonii* (D.B.Ward) P.I.Forst.; = *K. daigremontiana* Raym.-Hamet & H.Perrier × *K. delagoensis* Eckl. & Zeyh.]

Crassulaceae - Ch succ - Hybrid (horticultural origin) - Neophyte.

*First reports for Calabria (naturalized).*

*Exsiccata*: CALABRIA - Scalea lungo la SS 18 al km 258.6 (Cosenza), road edge, 50 m, 14.II.2017, 33S 566973-4408251, *leg. et det.* S. Fascetti (HLUC).

*Observata*: CALABRIA - Scalea a Scalea Vecchia (Cosenza), wall, 42 m, 16.VIII.2016, 33S 567670-4407701, *obs. et det.* A. Stinca.

Distribution in Italy: Liguria, Toscana, Puglia, Sicilia and Sardegna (Podda et al. 2012; Lazzaro et al. 2013; Manni & Lazzeri 2013; Galasso 2014; Di Gregorio et al. 2017).

Notes: artificial hybrid recently described (Ward 2006) and often cultivated in Italy as ornamental plant. The individuals observed in both the cited localities, have spread by plantlets produced at the margins of leaves shown a rapid spread. It is probable that many of the Italian reports of *K. daigremontiana* Raym.-Hamet & H.Perrier are erroneous and to be allocated to *Kalanchoë ×houghtonii* D.B.Ward.

290

***Lantana camara* L. subsp. *aculeata* (L.) R.W.Sanders** [≡ *Lantana aculeata* L.]

Verbenaceae - NP - America - Neophyte.

*First reports for Calabria (casual).*

*Exsiccata*: CALABRIA - Scalea lungo la SP 9 al confine con Santa Domenica Talao in corrispondenza del Vivaio Agrigarden (Cosenza), road edge, 27 m, 15.V.2016, 33S 570793-4403900, *leg. et det.* S. Fascetti (HLUC).

*Observata*: CALABRIA - Scalea lungo la SS 18 al km 258.6 (Cosenza), road edge, 50 m, 11.XII.2016, 33S 566973-4408251, *obs. et det.* S. Fascetti.

Distribution in Italy: only recently, it has been discovered in Italy, in Abruzzo, Molise and Sicilia (Galasso et al. 2016a, 2016b, 2017).

Notes: widely cultivated in the gardens of the study area, the species has shown a rapid spread along the main roads of the Tyrrhenian coast of northern Calabria. We followed the taxonomic scheme and nomenclature of Sanders (2012).

304

305 ***Lantana montevidensis* (Spreng.) Briq.** [= *Lippia montevidensis* Spreng.; = *Lantana sellowiana*  
306 Link & Otto]

307 Verbenaceae - NP - South America - Neophyte.

308 *First reports for Calabria and Italy (casual).*

309 *Exsiccata:* CALABRIA - Scalea lungo la SP 9 al km 4 presso Contrada Suvereta (Cosenza), road  
310 edge, 29 m, 10.V.2016, 33S 570793-4403894, *leg. et det.* S. Fascetti (HLUC).

311 Notes: this species is considered highly invasive in southern USA and Australia (Parson &  
312 Cuthbertson 2001) because is rapidly replacing the pasture's native plants on shallow stony soils  
313 affected by severe drought. In addition, all taxa of *Lantana* L. have poisonous fruits for humans and  
314 the leaves are highly toxic to animals. We followed the taxonomic scheme and nomenclature of  
315 Munir (1996).

316

317 ***Lemna minuta* Kunth**

318 Araceae - I nat - America - Neophyte.

319 *First reports for Campania (casual).*

320 *Exsiccata:* CAMPANIA - Castel Volturno tra località Le Trenta Moggia e località Parco Venola  
321 (Caserta), canal with *Eichhornia crassipes* (Mart.) Solms, 0 m, 07.VII.2013, 33T 418173-4534837,  
322 *leg.* A. Stinca *et* G. D'Auria, *det.* G. Galasso *et* E. Banfi (PORUN, MSNM).

323 Distribution in Italy: Lombardia, Trentino-Alto Adige, Veneto, Friuli Venezia Giulia, Emilia-  
324 Romagna, Toscana, Marche, Umbria, Lazio, Abruzzo, Puglia, Calabria, Sicilia and Sardegna  
325 (Beccarisi & Ernandes 2007; Desfayes 2008; Celesti-Grapow *et al.* 2010; Gigante *et al.* 2010;  
326 Peruzzi & Savio 2011; Iamonico *et al.* 2011; Marrone & Naselli-Flores 2011; Abati *et al.* 2012;  
327 Brundu *et al.* 2012; Salerno & Ceschin 2015; for Sardegna not reported by Camarda *et al.* 2016).

328 Notes: in Campania this exotic plant was probably accidentally introduced.

329

330 ***Ligustrum sinense* Lour.**

331 Oleaceae - NP - South-East Asia - Neophyte.

332 *First reports for Calabria (casual) and change of the invasive status for Campania (previous*  
333 *status: naturalized alien; current status: casual alien).*

334 *Exsiccata:* CALABRIA - Palmi in località S. Gaetano nei pressi dello svincolo dell'Autostrada A3  
335 (Reggio Calabria), synanthropic environments, 236 m, 26.IX.2014, 33S 575895-4246919, *leg. et*  
336 *det.* A. Stinca (PORUN).

337 Distribution in Italy: Piemonte, Lombardia, Trentino-Alto Adige, Veneto, Friuli Venezia Giulia,  
338 Toscana, Umbria, Lazio, Abruzzo, Molise and Campania (Celesti-Grapow *et al.* 2010; Marchetti

2011; Rosati et al. 2012; Lonati et al. 2014; Conti et al. 2016; Falcinelli et al. 2016; Stinca et al. 2016; Galasso et al. 2017).

Notes: in Campania it is reported as a naturalized alien (Rosati et al. 2012; Stinca et al. 2016). However, *L. sinense* Lour. in this region not form self-replacing populations, and which rely on repeated introductions for their persistence.

344

345 ***Lobelia erinus* L.**

346 Campanulaceae - T scap - South Africa - Neophyte.

347 *First reports for Campania and southern Italy (casual).*

348 *Exsiccata*: CAMPANIA - Salerno in via Manganario, between floor cracks, 58 m, 19.IX.2013, 33T  
349 480464-4503749, *leg. et det.* E. Del Guacchio (Herb. Del Guacchio); Monteforte Cilento tra località  
350 Tempa e località Acquaro (Salerno), wall of limestone blocks, 398 m, 08.X.2016, 33T 515325-  
351 4467641, *leg. et det.* A. Stinca (PORUN).

352 Distribution in Italy: Lombardia, Trentino-Alto Adige, Liguria and Toscana (Banfi & Galasso 2010;  
353 Wilhalm et al. 2013; D'Antraccoli & Roma-Marzio 2015; Longo et al. 2017).

354 Notes: this species is grown in Campania with different cultivars as a perennial grass, but appears  
355 mostly as a therophyte outside the cultivation.

356

357 ***Lonicera japonica* Thunb.**

358 Caprifoliaceae - P lian - South-East Asia - Neophyte.

359 *First reports for Puglia (casual).*

360 *Observata*: PUGLIA - Bari in località Mater Dei, epiphyte on *Phoenix canariensis* Chabaud, 23 m,  
361 17.V.2013, 33T 658358-4551256, *obs. et det.* E.V. Perrino et A. Stinca.

362 Distribution in Italy: Valle d'Aosta, Piemonte, Lombardia, Trentino-Alto Adige, Veneto, Friuli  
363 Venezia Giulia, Liguria, Emilia-Romagna, Toscana, Marche, Umbria, Lazio, Abruzzo, Campania,  
364 Calabria, Sicilia and Sardegna (Bacchetta et al. 2009; Celesti-Grapow et al. 2010; Di Gregorio et al.  
365 2017).

366

367 ***Nandina domestica* Thunb.**

368 Berberidaceae - NP - South-East Asia - Neophyte.

369 *First reports for Campania and Italian peninsula (casual).*

370 *Exsiccata*: CAMPANIA - Pignataro Maggione ai Vivai Imperatore (Caserta), field used to the  
371 stationing of potted plants, 67 m, 20.IV.2016, 33T 429047-4559902, *leg. et det.* A. Stinca  
372 (PORUN).

373 Distribution in Italy: Lombardia and Veneto (Banfi & Galasso 2010; Masin & Scortegagna 2012).  
374 Also reported in Sardegna as “only planted” by Camarda et al. (2016).

375 Notes: the individuals observed in Campania have spread by the seeds of nearby cultivated plants.  
376

377 ***Oenothera lindheimeri* (Engelm. & A.Gray) W.L.Wagner & Hoch** [ $\equiv$  *Gaura lindheimeri*  
378 Engelm. & A.Gray]

379 Onagraceae - H suffr - North America (USA) - Neophyte.

380 *First reports for Campania (casual).*

381 *Exsiccata*: CAMPANIA - Torre Annunziata tra il Lido Azzurro e Capo Oncino (Napoli), beach, 1  
382 m, 29.IV.2015, 33T 452414-4511725, *leg.* A. Stinca *et* G. D’Auria, *det.* A. Stinca (PORUN).

383 Distribution in Italy: Lombardia, Veneto and Puglia (Ardenghi & Parolo 2011; Costalonga 2012;  
384 Domina et al. 2015a).

385 Notes: the individuals observed in Campania have spread by the seeds of nearby cultivated plants.  
386

387 ***Panicum capillare* L.**

388 Poaceae - T scap - North America - Neophyte.

389 *Confirmation for Campania (casual).*

390 *Exsiccata*: CAMPANIA - Campagna lungo il Fiume Sele (Salerno), river embankment, 55 m,  
391 17.VII.2012, 33T 512959-4495473, *leg. et det.* G. Salerno *et* L. Rosati (HLUC).

392 Distribution in Italy: Valle d’Aosta, Piemonte, Lombardia, Trentino-Alto Adige, Veneto, Friuli  
393 Venezia Giulia, Liguria, Emilia-Romagna, Toscana, Marche, Umbria, Lazio, Abruzzo, Puglia,  
394 Basilicata and Calabria (Celesti-Grapow et al. 2010; Bernardo & Caldararo 2014).

395 Notes: in Campania it was indicated by Cortesi (1906, sub *P. capillare* L.) for Cava de’ Tirreni  
396 (Salerno) (specimen in RO!, *vid.* E. Del Guacchio: “Presso alla Cava”, s.d., [*C. Borgia*], sub *P.*  
397 *capillare*), and more recently by Viegi and Cela Renzoni (1981, sub *P. capillare* L.), but without  
398 locality.  
399

400 ***Persicaria capitata* (Buch.-Ham. ex D.Don) H.Gross** [ $\equiv$  *Polygonum capitatum* Buch.-Ham. ex  
401 D.Don;  $\equiv$  *Cephalophilon capitatum* (Buch.-Ham. ex D.Don) Tzvelev]

402 Polygonaceae - H rept - South Asia (Pakistan, Himalaya and China) - Neophyte.

403 *First reports for Calabria (casual).*

404 *Exsiccata*: CALABRIA - Scalea a Scalea Vecchia (Cosenza), wall of limestone blocks, 25 m,  
405 15.VIII.2015, 33S 567705-4407636, *leg.* A. Stinca *et* M. Ravo, *det.* A. Stinca (PORUN).

406 Distribution in Italy: Piemonte, Trentino-Alto Adige, Toscana, Liguria, Campania, Puglia and  
407 Sicilia (Celesti-Gradow et al. 2010; Pasta 2012; Stinca et al. 2012; Bertolli & Prosser 2014;  
408 Schiappacasse & Peccenini 2009; D'Antraccoli et al. 2015; Olivieri 2015).

409

410 ***Phyla nodiflora* (L.) Greene** [ $\equiv$  *Verbena nodiflora* L.;  $\equiv$  *Lippia nodiflora* (L.) Michx.]

411 Verbenaceae - H rept - Tropical America, Africa and Asia - Neophyte.

412 *First reports for Basilicata (naturalized).*

413 *Exsiccata*: BASILICATA - Policoro al Lido di Policoro (Matera), humid environments of the dune,  
414 1 m, 17.VI.2014, 33T 644685-4447990, *leg. et det.* G. Salerno (HLUC).

415 Distribution in Italy: Liguria, Emilia-Romagna, Toscana, Abruzzo, Campania, Puglia, Calabria,  
416 Sicilia and Sardegna (De Martis & Loi 1981, 1982; Celesti-Gradow et al. 2010; Adorni et al. 2012).

417 Notes: at Lido di Policoro this species is widespread in the humid environments of the dune, where  
418 it shows a noticeable vegetative propagation and it appears stabilized.

419

420 ***Schinus molle* L.**

421 Anacardiaceae - P scap - South America - Neophyte.

422 *First reports for Campania (casual).*

423 *Exsiccata*: CAMPANIA - Torre Annunziata tra il Lido Azzurro e Capo Oncino (Napoli), beach, 1  
424 m, 14.IV.2015, 33T 452414-4511725, *leg.* A. Stinca *et* G. D'Auria, *det.* A. Stinca (PORUN).

425 Distribution in Italy: Umbria, Basilicata and Sardegna (Celesti-Gradow et al. 2010).

426 Notes: this species is popular as an ornamental plant in southern Italy. The individuals observed in  
427 Campania have spread by the seeds of nearby cultivated plants.

428

429 ***Sedum palmeri* S.Watson** [= *Sedum compressum* Rose]

430 Crassulaceae - Ch suffr (succ) - North America (Mexico) - Neophyte.

431 *First reports for Campania and southern Italy (casual).*

432 *Exsiccata*: CAMPANIA - Ercolano (Napoli), wall, 85 m, 10.III.2013, 33T 445419-4518208, *leg.* A.  
433 Stinca *et* G. D'Auria, *det.* A. Stinca (PORUN); Salerno al Trincerone, wall, 30 m, 22.XI.2015, 33T  
434 480265-4503242, *leg. et det.* E. Del Guacchio (Herb. Del Guacchio).

435 *Observata*: CAMPANIA - Salerno al Trincerone, wall, 30 m, 15.III.2017, 33T 480265-4503242,  
436 *obs. et det.* A. Stinca.

437 Distribution in Italy: Lombardia, Veneto, Liguria, Emilia-Romagna and Lazio (Celesti-Gradow et  
438 al. 2010; Masin et al. 2010; Pasquali 2013; Alessandrini et al. 2016).

439 Notes: this species is popular as an ornamental plant in southern Italy. The individuals observed in  
440 both the cited localities, have spread almost surely by seeds.

441

442 ***Sesbania punicea* (Cav.) Benth.** [≡ *Piscidia punicea* Cav.]

443 Fabaceae - P scap - South America - Neophyte.

444 *First reports for Calabria (naturalized).*

445 *Exsiccata*: CALABRIA - Santa Maria del Cedro in Contrada San Bartolo (Cosenza), uncultivated  
446 land at road edge, 146 m, 18.VIII.2015, 33S 573229-4401423, *leg. et det.* S. Fascetti (HLUC).

447 Distribution in Italy: Campania, Puglia and Sardegna (Celesti-Grapow et al. 2010; Olivieri 2010;  
448 Del Guacchio 2015; Domina et al. 2015b).

449 Notes: *S. punicea* (Cav.) Benth. is not common as ornamental plant in Calabria, but recently it  
450 shows undergoing rapid propagation by seed in uncultivated lands on sub-acidic soils.

451

452 ***Solanum elaeagnifolium* Cav.**

453 Solanaceae - H scap - North America (USA and Mexico) - Neophyte.

454 *First reports for Campania (casual).*

455 *Exsiccata*: CAMPANIA - Capaccio in località Seliano (Salerno), moved soil, 10 m, 11.XII.2013,  
456 33T 499491-4477149, *leg.* M. Bellelli, *det.* A. Stinca *et* M. Bellelli (PORUN); Capaccio in località  
457 Seliano (Salerno), moved soil, 10 m, 24.VIII.2014, 33T 499491-4477149, *leg. et det.* A. Stinca  
458 (PORUN).

459 Distribution in Italy: Emilia-Romagna, Toscana, Lazio, Molise, Puglia, Basilicata, Calabria, Sicilia  
460 and Sardegna (Anzalone et al. 2010; Celesti-Grapow et al. 2010).

461 Notes: in the cited locality, this exotic plant arrived by soil transportation from a nearby pit, and  
462 therefore it probably occurs elsewhere in the Campania region.

463

464 ***Solanum sisymbriifolium* Lam.**

465 Solanaceae - Ch frut - South America - Neophyte.

466 *First reports for Campania and southern Italy (casual).*

467 *Exsiccata*: CAMPANIA - Portici al Parco Reale (Napoli), holm oak forest edge, 65 m, 27.V.2013,  
468 33T 444717-4518087, *leg. et det.* A. Stinca (PORUN).

469 *Observata*: CAMPANIA - Portici al Parco Reale (Napoli), holm oak forest edge, 65 m, 20.V.2015,  
470 33T 444784-4518297, *obs. et det.* A. Stinca.

471 Distribution in Italy: Lombardia, Lazio and Sardegna (Anzalone et al. 2010; Celesti-Grapow et al.  
472 2010).

473 Notes: this species is not grown in the Portici Botanical Garden and was not observed in cultivation  
474 in Vesuvian area. The individuals observed were probably born from seeds transported by birds.

475

476 ***Taxodium distichum* (L.) Rich.** [≡ *Cupressus disticha* L.]

477 Cupressaceae - P scap - North America (USA) - Neophyte.

478 *First reports for Basilicata and Italian peninsula (naturalized).*

479 *Exsiccata*: BASILICATA - Rionero in Vulture al Lago Grande di Monticchio (Potenza),  
480 spontaneous in reforestation area, 660 m, 20.VII.2010, 33T 551047-4531623, *leg. et det.* S. Fascetti  
481 *et* L. Rosati (HLUC).

482 Distribution in Italy: Lombardia, Trentino-Alto Adige, Veneto and Sardegna (Masin & Tietto 2005;  
483 Celesti-Grapow *et al.* 2010. Also reported in Sardegna (Podda *et al.* 2012), but indicated as “only  
484 planted” by Camarda *et al.* (2016).

485 Notes: this species was planted on the banks of the Lago Grande di Monticchio for reforestation  
486 purposes around 1950. Today it actively reproduces vegetatively with a tendency to invade the  
487 vegetation belt dominated by helophytes and riparian forest with *Alnus glutinosa* (L.) Gaertn.  
488 Herein *T. distichum* (L.) Rich. produces abundant seeds and seedlings were occasionally observed  
489 along the banks. However, it was not detected young individuals, certainly derived from seed.

490

491 ***Tradescantia pallida* (Rose) D.R.Hunt** [≡ *Setcreasea pallida* Rose; = *Setcreasea purpurea* Boom]

492 Commelinaceae - G rhiz - North America (Mexico) - Neophyte.

493 *First reports for Calabria and continental Italy (casual).*

494 *Exsiccata*: CALABRIA - Verbicaro al rione Bonifanti (Cosenza), under a rocky slope, 399 m,  
495 10.XII.2016, 33S 578047-4400889, *leg. et det.* S. Fascetti (HLUC).

496 Distribution in Italy: only recently it has been discovered in Italy in Sardegna (Camarda *et al.* 2016).

497 Notes: this species is popular as an ornamental plant in southern Italy. In Calabria is a potential  
498 naturalized species because of its lively vegetative reproduction. We followed the taxonomic  
499 scheme and nomenclature of Faden (2000).

500

501 ***Veronica peregrina* L.**

502 Plantaginaceae - T scap - North America (USA) - Neophyte.

503 *Confirmation for Campania (casual).*

504 *Exsiccata*: CAMPANIA - Poggiomarino presso il Garden Center Di Lorenzo (Napoli), moved and  
505 moist soil, 28 m, 20.IV.2016, 33T 460971-4515871, *leg. et det.* A. Stinca (PORUN); Cellole al

506 Vivaio Forestale Regionale Domitiana (Caserta), moved and moist soil, 10 m, 21.IV.2016, 33T  
507 402763-4561211, *leg.* A. Stinca *et* G. D'Auria, *det.* A. Stinca (PORUN).  
508 Distribution in Italy: Valle d'Aosta, Piemonte, Lombardia, Trentino-Alto Adige, Veneto, Friuli  
509 Venezia Giulia, Emilia-Romagna, Toscana, Marche, Umbria, Lazio, Abruzzo, Puglia, Basilicata,  
510 Calabria and Sicilia (Celesti-Gradow *et al.* 2010; Gangale *et al.* 2010).  
511 Notes: in Campania, *V. peregrina* L. was anciently reported for flooded places at Lake Fusaro  
512 (Naples) and Capua (Caserta) (Tenore 1824-1829: 15). A pertinent specimen is preserved:  
513 "Fusaro", s.d., s.c. (NAP!, Collection Tenore, *vid.* J.A. Sánchez Agudo, *vid.* E. Del Guacchio).
